# Supplementary material for: Drug-Related Problems and Sick Day Management Considerations for Medications that Contribute to the Risk of Acute Kidney Injury
Source: MDPI journal article supplement (doi:10.3390/jcm13020343), 2024-01-07
Supplement: s1 [file s1]

## Supplementary material

Table S1: Modified DOCUMENT DRPs and examples from RMMRs

| Code | Drug related problem         | Description                                                                                                                                          | Example                                                                                                                                                                                        |
|------|------------------------------|------------------------------------------------------------------------------------------------------------------------------------------------------|------------------------------------------------------------------------------------------------------------------------------------------------------------------------------------------------|
| D1   | Duplication                  | Inappropriate use of two drugs from the same therapeutic class                                                                                       | “Mrs is administered 2 beta blockers; metoprolol and propranolol. Consider reviewing benefits versus risk...”                                                                                  |
| D2   | Drug interaction             | Likely interaction between two prescribed drugs (no symptoms evident yet)                                                                            | “Pantoprazole in the morning may reduce absorption of thyroxine”                                                                                                                               |
| D3   | Wrong Drug                   | Incorrect drug supplied, either by an incorrect doctor’s prescription or incorrectly dispensed by the pharmacy                                       | “...she was commenced on citalopram...currently administered escitalopram”                                                                                                                     |
| D4   | Incorrect strength           | Incorrect or no details about strength of medication supplied                                                                                        | N/A                                                                                                                                                                                            |
| D5   | Inappropriate dosage form    | Formulation is inappropriate in terms of the intended use of the product                                                                             | “In place of current tablets that are crushed, consider liquid formulation like OsteVit-D that can be administered once a week”                                                                |
| D6   | Contraindications apparent   | Patient has a contraindication or precaution to the drug being used due to their medical conditions, or a previous allergy to the drug or drug group | “Hiprex is ineffective in renal impairment because of inadequate concentrations in renal tubules. In view of his renal impairment, consider a review of the ongoing benefit of Hiprex tablets” |
| D7   | No indication apparent       | No clear indication for the use of the drug                                                                                                          | “PRN Hydrozole appears charged post-groin excoriation event... he does not require use of Hydrozole”                                                                                           |
| D0   | Other drug selection problem | Other drug selection issues, such as the patient is taking expired medication or a more effective drug than the one prescribed is available          | N/A                                                                                                                                                                                            |
| O1   | Prescribed dose too high     | Total daily dose exceeds guidelines, either due to reference dose ranges or patient parameters (age, renal function etc.)                            | “Mrs X is administered metformin 1g twice                                                                                                                                                      |

|    |                                                     |                                                                                                                                     |                                                                                                                                               |
|----|-----------------------------------------------------|-------------------------------------------------------------------------------------------------------------------------------------|-----------------------------------------------------------------------------------------------------------------------------------------------|
|    |                                                     |                                                                                                                                     | daily...The maximum recommended metformin dose is 1g daily if CrCl is between 30 and 60 mL/min”                                               |
| O2 | Prescribed dose too low                             | Total daily dose is not adequate for treatment                                                                                      | “Mrs X is charted for a low dose of allopurinol which may not be therapeutic... it would be worth reviewing the ongoing need for allopurinol” |
| O3 | Incorrect/unclear dosing instructions               | Specified dosing frequency/schedule or duration of treatment is unclear or incorrect                                                | “Suggest changing the duration of application for clotrimazole cream...to minimise the risk of antimicrobial resistance”                      |
| O0 | Other dose problem                                  | Other dose related problem, such as incorrect frequency or schedule                                                                 | N/A                                                                                                                                           |
| C1 | Taking too little                                   | Patient using too little of the medication due to forgetfulness or poor understanding of therapy                                    | “Her signing sheet suggests that she refuses her dinner time paracetamol dosage”                                                              |
| C2 | Taking too much                                     | Patient using too much of the medication due to forgetfulness or poor understanding of therapy                                      | N/A                                                                                                                                           |
| C3 | Erratic use of medication                           | Patient using medication on an erratic basis                                                                                        | “I noted she refused diclofenac gel 4 times last week. Please ensure compliance...”                                                           |
| C4 | Intentional drug misuse (including OTC medications) | Suspected overuse of a drug that is potentially abused                                                                              | N/A                                                                                                                                           |
| C5 | Difficulty using dosage form                        | Patient has a physical problem using the dosage form due to swallowing difficulties, manual dexterity etc.                          | “She may not have the inspiratory effect to inhale the dose from the Turbuhaler device”                                                       |
| C0 | Other compliance problem                            | Other compliance issues, such as patient choosing not to take the medication due to the product information or a media release etc. | “...PRN analgesic was given for behaviour without evidence of pain, so it is very likely to be considered as restraint.”                      |
| U1 | Condition undertreated                              | Patient has a symptom or condition that is not currently being treated adequately                                                   | “Consider if Mr X may benefit from low dose Norspan to assist with pain and comfort should he have chronic pain associated with his legs”     |

|       |                                                                           |                                                                                                                                                                                                  |                                                                                                                |
|-------|---------------------------------------------------------------------------|--------------------------------------------------------------------------------------------------------------------------------------------------------------------------------------------------|----------------------------------------------------------------------------------------------------------------|
| U2    | Condition untreated                                                       | Patient has a symptom or condition that is not being treated                                                                                                                                     | “Due to institutionalised nature, she may develop deficiency of vitamin D”                                     |
| U3    | Preventative therapy required                                             | Patient requires additional therapy to prevent an adverse event occurring (due to patient’s therapy, coexisting diseases or risk factors)                                                        | “Given the increased risk of bleeding, consider a low dose PPI as gastroprotection...”                         |
| U0    | Other untreated problem                                                   | Other untreated indication problem                                                                                                                                                               | N/A                                                                                                            |
| M1    | Laboratory monitoring                                                     | Patient requires a laboratory test, such as serum electrolyte or drug levels (no symptoms evident yet)                                                                                           | “...I was not able to locate any blood test report. Query if rechecking UEC and magnesium may be desirable...” |
| M2    | Non laboratory monitoring                                                 | Patient requires a non-laboratory test, such as BP, BSL or weight check (no symptoms evident yet)                                                                                                | “Consider checking BGL’s post meals...”                                                                        |
| M0    | Other monitoring problem                                                  | Other monitoring problem, such as patient unable to afford monitoring                                                                                                                            | N/A                                                                                                            |
| E1    | Patient requests drug information                                         | Patient requests information about their medication                                                                                                                                              | N/A                                                                                                            |
| E2    | Patients requests disease management advice                               | Patient requests information about the management or prevention of a condition                                                                                                                   | N/A                                                                                                            |
| E3    | Confusion about therapy or condition                                      | Patient has a poor understanding of their medical condition, but their medication compliance appears to be adequate according to the dispensing history                                          | N/A                                                                                                            |
| E4    | Demonstration of device                                                   | Patient has a technical problem with the administration of a device                                                                                                                              | N/A                                                                                                            |
| E0    | Other education or information problem                                    | Other education problem, such as another health professional requests information                                                                                                                | N/A                                                                                                            |
| N0    | Clinical interventions that cannot be classified under any other category | Clinical interventions that the pharmacist feels does not belong elsewhere (must still be a clinical problem, not administrative)                                                                | N/A                                                                                                            |
| T1    | Toxicity caused by dose                                                   | Patient has signs or symptoms of an adverse reaction that is likely to be dose-related                                                                                                           | N/A                                                                                                            |
| T2    | Toxicity caused by drug interaction                                       | Patient has signs or symptoms of an adverse reaction that is likely to be related to the presence of an interacting drug                                                                         | N/A                                                                                                            |
| T3    | Toxicity evident                                                          | Patient experiencing symptoms of toxicity where there is a suspected medication cause                                                                                                            | N/A                                                                                                            |
| T4 ** | Cautioning against toxicity                                               | Patient at risk of toxicity/adverse drug reaction but <u>no symptoms yet</u> . Pharmacists may warn of side effects/cautions to take when using the medication e.g. risk of falls, sedation etc. | “...to minimise risk of anticholinergic effects, confusion, dependence, and tolerance, particularly            |

|       |                        |                                                                        |                                                                                                                                      |
|-------|------------------------|------------------------------------------------------------------------|--------------------------------------------------------------------------------------------------------------------------------------|
|       |                        |                                                                        | as risks may be increased for her advanced age...”                                                                                   |
| T0    | Other toxicity evident | Other toxicity suspected of being related to a drug                    | N/A                                                                                                                                  |
| NC ** | Non-clinical (NC)      | Non-clinical issues, often documentation/administrative discrepancies. | “...indication for venlafaxine (depression)...were written by the doctor. These were not shown on the electronic medication profile” |

\*\*New categories added

Table S2: Modified DOCUMENT recommendations and examples from RMMR

| Code   | Recommendation                  | Description                                                                                                                                        | Example from RMMR                                                                                   |
|--------|---------------------------------|----------------------------------------------------------------------------------------------------------------------------------------------------|-----------------------------------------------------------------------------------------------------|
| R1     | Dose decrease                   | Pharmacist recommends the daily dose of medication is decreased                                                                                    | “...suggest a dose reduction to 1 tablet...”                                                        |
| R2     | Dose increase                   | Pharmacist recommends the daily dose of medication is increased                                                                                    | “...slight increase in aperient may be considered...”                                               |
| R3     | Drug change                     | Pharmacist recommends a change in current medications, such as initiating or ceasing a medication                                                  | “...remove later in the evening so that the nitrate free period is [smaller]”                       |
| R3a ** | Drug change: cease              | Pharmacist specifies ceasing a medication                                                                                                          | “...consider ongoing need for medication with view to cease for now”                                |
| R3b ** | Drug change: initiate           | Pharmacist specifies initiating a medication                                                                                                       | “You may wish to consider addition of regular paracetamol to reduce dependence on opioid analgesic” |
| R3c ** | Drug change: cease and initiate | Pharmacist specifies ceasing a medication and initiating another                                                                                   | “...trialling a switch to a different antidepressant such as fluoxetine...”                         |
| R4     | Drug formulation change         | Pharmacist recommends a change in formulation that does not alter the drug or its total daily dose                                                 | “...consider switching to immediate release formulation”                                            |
| R5     | Drug brand change               | Pharmacist recommends a change in the brand to improve compliance or due to stock unavailability etc                                               | N/A                                                                                                 |
| R6     | Dose frequency/schedule change  | Pharmacist suggests a change in the number of times per day or timing of the doses, without changing the total daily dose                          | “It has an onset effect of 6-12 hour. Review this timeslot if appropriate”                          |
| R7     | Prescription not dispensed      | Pharmacist does not dispense the prescription due to the circumstances, such as when the patient needs to visit the prescriber prior to dispensing | N/A                                                                                                 |

|         |                                                                        |                                                                                                                                                                                                                                                 |                                                                                                    |
|---------|------------------------------------------------------------------------|-------------------------------------------------------------------------------------------------------------------------------------------------------------------------------------------------------------------------------------------------|----------------------------------------------------------------------------------------------------|
| R8      | Other changes to therapy                                               | Pharmacist recommends another change to patient's current therapy                                                                                                                                                                               | "...query if a trial of topical NSAID may be considered before taking PRN celecoxib"               |
| R8a **  | Drug change: combination formulation                                   | Pharmacist recommends to changing an individual drug formulation to a combined drug formulation.                                                                                                                                                | "Suggest combining ezetimibe and rosuvastatin (i.e. Rosuzet) to reduce pill burden"                |
| R9      | Refer to prescriber; prescriber to continue monitoring, review, etc... | Pharmacist refers patient to their prescriber to resolve the DRP                                                                                                                                                                                | "Consider assessment of depression symptoms for e.g. with a Cornell score..."                      |
| R9a **  | Review prescribed medicine                                             | Pharmacist recommends to specifically review the current prescribed medications                                                                                                                                                                 | "A review of his antihypertensive regime may be warranted"                                         |
| R10     | Refer to hospital                                                      | Pharmacist refers patient to the hospital to resolve the DRP                                                                                                                                                                                    | N/A                                                                                                |
| R11     | Refer for medication review                                            | Pharmacist recommends patient have a medication review to resolve the DRP (known as a Home Medications Review or HMR in Australia where a pharmacist visits the patient at home and sends a clinical review letter to their treating physician) | N/A                                                                                                |
| R12     | Other referral required                                                | Pharmacist refers patient to another health professional to resolve the DRP, such as a dentist, podiatrist, diabetes educator etc                                                                                                               | "Mr X may benefit from assessment by the geriatrician as well as possibly the psychiatric team..." |
| R13     | Education/counselling session                                          | Pharmacist provides a detailed counselling or education session to the patient to resolve the DRP                                                                                                                                               | "... she was encouraged to report worsening bowel issue..."                                        |
| R14     | Written summary of medications                                         | Pharmacist provides patient with a detailed list of their medications to resolve the DRP                                                                                                                                                        | N/A                                                                                                |
| R15     | Commence dose administration aid                                       | Pharmacist suggests that the patient start using a dose administration aid (such as a Webster pack or dosette box)                                                                                                                              | N/A                                                                                                |
| R16     | Other written information                                              | Pharmacist provides other written information, such as Self Care cards                                                                                                                                                                          | N/A                                                                                                |
| R16a ** | Information to nursing staff                                           | Pharmacist provides information to nursing staff to resolve DRP                                                                                                                                                                                 | "Staff need to monitor Mr X for signs and symptoms indicative of a bleed"                          |
| R17     | Monitoring: laboratory test                                            | Pharmacist suggests that the prescriber undertake some laboratory monitoring to monitor for DRPs                                                                                                                                                | "...advise checking her current Ca...before each 6-monthly dose"                                   |

|        |                                   |                                                                                                                   |                                                                                             |
|--------|-----------------------------------|-------------------------------------------------------------------------------------------------------------------|---------------------------------------------------------------------------------------------|
| R18    | Monitoring: non-laboratory test   | Pharmacist suggests that the patient or prescriber undertake some non-laboratory monitoring to monitor for DRPs   | "...monitor BGL at bedtime for 1 week..."                                                   |
| R19    | No recommendation necessary       | Pharmacist has investigated the problem and finds that the problem does not need to be addressed with any changes | "Given the pregabalin dose is being withdrawn, this may resolve the current issue"          |
| R20 ** | Non-clinical e.g. update document | Pharmacists makes a non-clinical recommendation to resolve issue.                                                 | "Suggest updating his medication list as appropriate"                                       |
| R0 **  | Not classifiable                  | Pharmacist recommendation cannot be classified by any other category                                              | "Reconciliation of allergy information would be suggested for uniformity across the system" |

\*\*New categories added

Table S3: Full description of drug-related problems and recommendations made for non-SADMANS medications

| Drug Group     | Proportion of DRP (n%) | Type of problems found (n)                 | Most common recommendation made by pharmacists for the type of problem (n) |
|----------------|------------------------|--------------------------------------------|----------------------------------------------------------------------------|
| Nervous system | 362 (38.5%)            | Cautioning against toxicity (79)           | Dose decrease (15)                                                         |
|                |                        | No indication apparent (58)                | Drug change: cease (24)                                                    |
|                |                        | Condition undertreated (43)                | Other changes to therapy (7)                                               |
|                |                        | Toxicity caused by dose (28)               | Dose decrease (11)                                                         |
|                |                        | Prescribed dose too high (24)              | Dose decrease (19)                                                         |
|                |                        | Other drug selection problem (20)          | Drug change: cease and initiate (10)                                       |
|                |                        | Not classifiable (19)                      | Refer to prescriber (5)                                                    |
|                |                        | Other dose problem (16)                    | Dose decrease (6)                                                          |
|                |                        | Contraindications apparent (13)            | Dose decrease (4)                                                          |
|                |                        | Incorrect/unclear dosing instructions (13) | Non-clinical (6)                                                           |
|                |                        | Non-clinical (8)                           | Non-clinical (6)                                                           |
|                |                        | Laboratory monitoring (7)                  | Monitoring: laboratory test (6)                                            |
|                |                        | Difficulty using dosage form (6)           | Drug formulation change (4)                                                |
|                |                        | Inappropriate dosage form (5)              | Drug formulation change (4)                                                |
|                |                        | Toxicity evident (5)                       | Drug change: cease and initiate (2)                                        |
|                |                        | Preventative therapy required (3)          | Drug change: initiate (2)                                                  |
|                |                        | Erratic use of medication (2)              | Dose increase (1)<br>Drug formulation change (1)                           |
|                |                        | Duplication (2)                            | Drug change: cease (2)                                                     |
|                |                        | Prescribed dose too low (2)                | Dose increase (1)<br>Drug formulation change (1)                           |

|                                 |                |                                            |                                                               |
|---------------------------------|----------------|--------------------------------------------|---------------------------------------------------------------|
|                                 |                | Condition untreated (2)                    | Other referral required (1)<br>Review prescribed medicine (1) |
|                                 |                | Other compliance problem (2)               | Refer to prescriber (2)                                       |
|                                 |                | Taking too little (1)                      | Dose decrease (1)                                             |
|                                 |                | Drug interaction (1)                       | Other changes to therapy (1)                                  |
|                                 |                | Wrong drug (1)                             | Review prescribed medicine (1)                                |
|                                 |                | Other toxicity problem (1)                 | Dose decrease (1)                                             |
|                                 |                | Other undertreated problem (1)             | Review prescribed medicine (1)                                |
| Alimentary tract and metabolism | 301<br>(32.0%) | No indication apparent (40)                | Drug change: cease (17)                                       |
|                                 |                | Condition undertreated (38)                | Dose increase (12)                                            |
|                                 |                | Cautioning against toxicity (35)           | Dose decrease (12)                                            |
|                                 |                | Laboratory monitoring (24)                 | Monitoring: laboratory test (24)                              |
|                                 |                | Other dose problem (23)                    | Dose decrease (15)                                            |
|                                 |                | Other drug selection problem (17)          | Drug change: cease and initiate (10)                          |
|                                 |                | Incorrect/unclear dosing instructions (16) | Dose frequency/schedule change (6)                            |
|                                 |                | Difficulty using dosage form (15)          | Drug formulation change (11)                                  |
|                                 |                | Not classifiable (14)                      | Drug change: cease (6)                                        |
|                                 |                | Non-clinical (13)                          | Information to nursing staff (7)                              |
|                                 |                | Prescribed dose too high (13)              | Dose decrease (9)                                             |
|                                 |                | Toxicity caused by dose (11)               | Drug change: cease (4)                                        |
|                                 |                | Contraindications apparent (8)             | Dose decrease (2)                                             |
|                                 |                | Inappropriate dosage form (7)              | Drug formulation change (7)                                   |
|                                 |                | Erratic use of medications (6)             | Drug change: cease (2)                                        |
|                                 |                | Condition untreated (5)                    | Dose increase (2)<br>Drug change: initiate (2)                |
|                                 |                | Preventative therapy required (5)          | Drug change: initiate (3)                                     |
|                                 |                | Prescribed dose too low (4)                | Dose increase (4)                                             |
|                                 |                | Taking too little (2)                      | Drug formulation change (2)                                   |
|                                 |                | Duplication (2)                            | Drug change: cease (1)<br>Drug change: cease and initiate (1) |
|                                 |                | Other compliance problem (1)               | Drug change: cease (1)                                        |
|                                 |                | Drug interaction (1)                       | Other referral required (1)                                   |
|                                 |                | Non laboratory monitoring (1)              | Monitoring: non laboratory test (1)                           |
| Cardiovascular system           | 104<br>(11.1%) | Cautioning against toxicity (31)           | Monitoring: laboratory test (7)                               |
|                                 |                | Toxicity caused by dose (14)               | Drug change: cease (4)                                        |
|                                 |                | Other dose problem (11)                    | Dose decrease (4)                                             |
|                                 |                | Other drug selection problem (9)           | Drug change: cease and initiate (5)                           |
|                                 |                | Laboratory monitoring (9)                  | Monitoring: laboratory test (8)                               |
|                                 |                | No indication apparent (5)                 | Drug change: cease (2)<br>Review prescribed medicine (2)      |
|                                 |                | Contraindications apparent (4)             | Monitoring: laboratory test (1)                               |

|                                |              |                                           |                                                                                                                                             |
|--------------------------------|--------------|-------------------------------------------|---------------------------------------------------------------------------------------------------------------------------------------------|
|                                |              |                                           | Drug change: cease (1)<br>Drug change: cease and initiate (1)<br>Dose frequency/schedule change (1)                                         |
|                                |              | Not classifiable (4)                      | Monitoring: non laboratory test (1)<br>Dose frequency/schedule change (1)<br>Other changes to therapy (1)<br>Review prescribed medicine (1) |
|                                |              | Condition undertreated (4)                | Drug change: initiate (3)                                                                                                                   |
|                                |              | Prescribed dose too high (3)              | Dose decrease (3)                                                                                                                           |
|                                |              | Prescribed dose too low (2)               | Dose increase (2)                                                                                                                           |
|                                |              | Non laboratory monitoring (2)             | Monitoring: non laboratory test (2)                                                                                                         |
|                                |              | Toxicity evident (2)                      | Dose decrease (1)<br>Monitoring: laboratory test (1)                                                                                        |
|                                |              | Taking too little (1)                     | Dose frequency/schedule change (1)                                                                                                          |
|                                |              | Erratic use of medications (1)            | Other change to therapy (1)                                                                                                                 |
|                                |              | Duplication (1)                           | Review prescribed medicine (1)                                                                                                              |
|                                |              | Incorrect/unclear dosing instructions (1) | Non-clinical (1)                                                                                                                            |
| Blood and blood forming organs | 48<br>(5.1%) | Cautioning against toxicity (14)          | Monitoring: laboratory test (8)                                                                                                             |
|                                |              | Contraindications apparent (4)            | Drug change: cease and initiate (2)<br>Monitoring: laboratory test (2)                                                                      |
|                                |              | Laboratory monitoring (4)                 | Monitoring: laboratory test (4)                                                                                                             |
|                                |              | Incorrect/unclear dosing instructions (4) | Review prescribed medicine (2)                                                                                                              |
|                                |              | Toxicity caused by dose (3)               | Monitoring: laboratory test (2)                                                                                                             |
|                                |              | Preventative therapy required (3)         | Drug change: initiate (2)                                                                                                                   |
|                                |              | Other drug selection problem (2)          | Drug change: cease and initiate (2)                                                                                                         |
|                                |              | No indication apparent (2)                | No recommendation necessary (1)<br>Review prescribed medicine (1)                                                                           |
|                                |              | Prescribed dose too high (2)              | Dose decrease (1)<br>Monitoring: laboratory test (1)                                                                                        |
|                                |              | Prescribed dose too low (2)               | Dose increase (2)                                                                                                                           |
|                                |              | Condition undertreated (2)                | Drug change: initiate (2)                                                                                                                   |
|                                |              | Other compliance problem (1)              | Information to nursing staff (1)                                                                                                            |
|                                |              | Drug interaction (2)                      | Dose frequency/schedule change (2)                                                                                                          |
|                                |              | Non laboratory monitoring (1)             | Monitoring: non laboratory test (1)                                                                                                         |



|                        |              |                                           |                                                              |
|------------------------|--------------|-------------------------------------------|--------------------------------------------------------------|
| Musculoskeletal system | 45<br>(4.8%) | Non-clinical (1)                          | Review prescribed medicine (1)                               |
|                        |              | Other dose problem (1)                    | Drug change: cease (1)                                       |
|                        |              | Preventative therapy required (16)        | Drug change: initiate (10)                                   |
|                        |              | No indication apparent (7)                | Review prescribed medicine (4)                               |
|                        |              | Cautioning against toxicity (5)           | Monitoring: laboratory test (3)                              |
|                        |              | Laboratory monitoring (3)                 | Monitoring: laboratory test (3)                              |
|                        |              | Not classifiable (3)                      | Monitoring: laboratory test (2)                              |
|                        |              | Non-clinical (2)                          | Non-clinical (2)                                             |
|                        |              | Condition untreated (2)                   | Drug change: initiate (1)<br>Monitoring: laboratory test (1) |
|                        |              | Other compliance problem (1)              | Refer to prescriber (1)                                      |
|                        |              | Erratic use of medication (1)             | Education/counselling session (1)                            |
|                        |              | Contraindications apparent (1)            | Monitoring: laboratory test (1)                              |
|                        |              | Other dose problem (1)                    | Dose increase (1)                                            |
|                        |              | Prescribed dose too low (1)               | Review prescribed medicine (1)                               |
|                        |              | Incorrect/unclear dosing instructions (1) | Refer to prescriber (1)                                      |
|                        |              | Condition undertreated (1)                | Information to nursing staff (1)                             |

Table S4: Full description of drug-related problems and recommendations made for SADMANS medications.

| Drug Group   | Proportion of DRP (n%) | Type of problems found (n)        | Most common recommendation for the type of problem (n)                |
|--------------|------------------------|-----------------------------------|-----------------------------------------------------------------------|
| Sulfonylurea | 7 (3.7%)               | Other drug selection problem (2)  | Drug change: cease and initiate (2)                                   |
|              |                        | Inappropriate dosage form (2)     | Drug formulation change (2)                                           |
|              |                        | Cautioning against toxicity (2)   | Drug change: cease and initiate (1)<br>Review prescribed medicine (1) |
|              |                        | Other dose problem (1)            | Monitoring: laboratory test (1)                                       |
| ACEi         | 18 (8.9%)              | Cautioning against toxicity (6)   | Monitoring: laboratory test (5)                                       |
|              |                        | Toxicity caused by dose (3)       | Drug change: cease (2)                                                |
|              |                        | Laboratory monitoring (2)         | Monitoring: laboratory test (2)                                       |
|              |                        | Not classifiable (2)              | Dose decrease (1)<br>Monitoring: non laboratory test (1)              |
|              |                        | Other dose problem (2)            | Dose decrease (2)                                                     |
|              |                        | Duplication (1)                   | Drug change: cease and initiate (1)                                   |
|              |                        | Non-laboratory monitoring (1)     | Monitoring: non laboratory test (1)                                   |
|              |                        | Preventative therapy required (1) | Drug change: initiate (1)                                             |
| Diuretics    | 65 (34.0%)             | Cautioning against toxicity (28)  | Monitoring: laboratory test (19)                                      |
|              |                        | Laboratory monitoring (9)         | Monitoring: laboratory test (9)                                       |
|              |                        | No indication apparent (7)        | Review prescribed medicine (4)                                        |

|           |            |                                           |                                                                                                             |
|-----------|------------|-------------------------------------------|-------------------------------------------------------------------------------------------------------------|
|           |            | Toxicity caused by dose (4)               | Monitoring: laboratory test (2)                                                                             |
|           |            | Other drug selection problem (3)          | Drug change: cease and initiate (2)                                                                         |
|           |            | Other dose problem (3)                    | Monitoring: laboratory test (1)<br>Dose decrease (1)<br>Dose increase (1)                                   |
|           |            | Incorrect/unclear dosing instructions (3) | Non-clinical (2)                                                                                            |
|           |            | Not classifiable (2)                      | Dose decrease (1)<br>Review prescribed medicine (1)                                                         |
|           |            | Condition undertreated (2)                | Monitoring: non laboratory test (1)<br>Dose decrease (1)                                                    |
|           |            | Erratic use of medication (1)             | Review prescribed medicine (1)                                                                              |
|           |            | Non-laboratory monitoring (1)             | Monitoring: non laboratory test (1)                                                                         |
|           |            | Prescribed dose too high (1)              | Dose decrease (1)                                                                                           |
|           |            | Preventative therapy required (1)         | Drug change: initiate (1)                                                                                   |
| Metformin | 41 (21.5%) | Laboratory monitoring (9)                 | Monitoring: laboratory test (9)                                                                             |
|           |            | Cautioning against toxicity (7)           | Dose decrease (3)                                                                                           |
|           |            | Other drug selection problem (5)          | Drug change: combination formulation (4)                                                                    |
|           |            | Other dose problem (4)                    | Dose decrease (1)<br>Dose increase (1)<br>Monitoring: laboratory test (1)<br>Review prescribed medicine (1) |
|           |            | Non-laboratory monitoring (3)             | Monitoring: non laboratory test (3)                                                                         |
|           |            | Prescribed dose too high (3)              | Dose decrease (2)                                                                                           |
|           |            | Inappropriate dosage form (2)             | Drug formulation change (2)                                                                                 |
|           |            | Toxicity caused by dose (2)               | Dose decrease (2)                                                                                           |
|           |            | Condition undertreated (2)                | Dose decrease (1)<br>Drug change: initiate (1)                                                              |
|           |            | No indication apparent (1)                | Drug chance: cease (1)                                                                                      |
|           |            | Not classifiable (1)                      | Monitoring: laboratory test (1)                                                                             |
|           |            | Toxicity evident (1)                      | Dose decrease (1)                                                                                           |
|           |            | Preventative therapy required (1)         | Monitoring: laboratory test (1)                                                                             |
| ARB       | 22 (11.5%) | Cautioning against toxicity (8)           | Monitoring: non laboratory test (4)                                                                         |
|           |            | Laboratory monitoring (3)                 | Monitoring: laboratory test (3)                                                                             |
|           |            | Toxicity caused by dose (3)               | Dose decrease (1)<br>Monitoring: non laboratory test (1)<br>Review prescribed medicine (1)                  |
|           |            | Non laboratory monitoring (2)             | Monitoring: non laboratory test (2)                                                                         |
|           |            | Condition undertreated (2)                | Monitoring: non laboratory test (1)                                                                         |

|                  |            |                                         |                                                     |
|------------------|------------|-----------------------------------------|-----------------------------------------------------|
|                  |            |                                         | Review prescribed medicine (1)                      |
|                  |            | Contraindication apparent (1)           | Dose decrease (1)                                   |
|                  |            | Other dose problem (1)                  | Drug change: cease (1)                              |
|                  |            | Non-clinical (1)                        | Non-clinical (1)                                    |
|                  |            | Toxicity caused by drug interaction (1) | Drug change: cease (1)                              |
| NSAIDs           | 37 (18.3%) | Cautioning against toxicity (15)        | Monitoring: laboratory test (9)                     |
|                  |            | No indication apparent (7)              | Review prescribed medicine (4)                      |
|                  |            | Preventative therapy required (4)       | Drug change: initiate (4)                           |
|                  |            | Contraindication apparent (2)           | Drug change: cease (2)                              |
|                  |            | Laboratory monitoring (2)               | Monitoring: laboratory test (1)                     |
|                  |            | Non-clinical (2)                        | Non-clinical (2)                                    |
|                  |            | Prescribed dose too high (2)            | Dose decrease (1)<br>Review prescribed medicine (1) |
|                  |            | Other drug selection problem (1)        | Drug change: cease and initiate (1)                 |
|                  |            | Toxicity caused by dose (1)             | Drug change: cease (1)                              |
|                  |            | Toxicity evident (1)                    | Review prescribed medicine (1)                      |
| SGLT2 inhibitors | 1 (0.5%)   | Condition undertreated (1)              | Monitoring: laboratory test (1)                     |
